# Supplementary material
Source: PubMed Central journal article supplement (PMC7712497)
Supplement: NIHMS1648446-supplement-1.pdf [file NIHMS1648446-supplement-1.pdf]

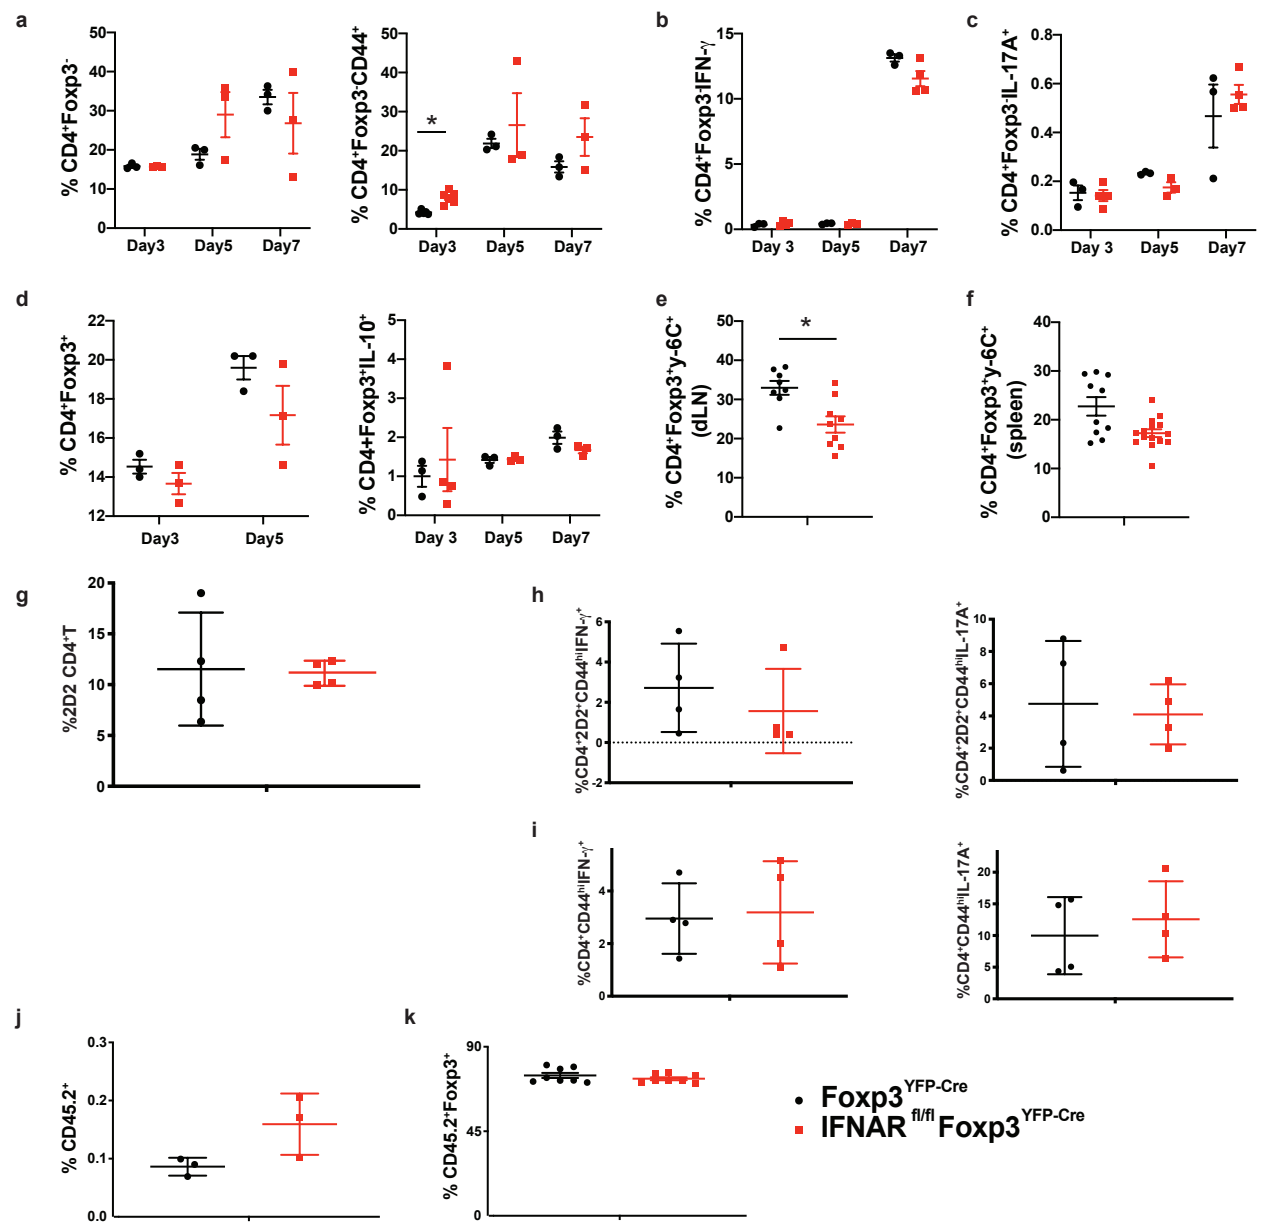

## Supplementary Fig 1 | CD4<sup>+</sup> T cell phenotypes during the priming phase of EAE.

**a**, Percentages and activation status of CD4<sup>+</sup>Foxp3<sup>+</sup> T cells in dLN. **b**, and **c**, Cytokine production by CD4<sup>+</sup>Foxp3<sup>+</sup> in dLN at various time points post immunization (N≥3, mean± SE). **d**, Percentages of and IL-10 production by of CD4<sup>+</sup>Foxp3<sup>+</sup> cells in dLN at various timepoints post immunization ( N≥3, mean± SE). **e**, Ly-6C expression by CD4<sup>+</sup>Foxp3<sup>+</sup> T cells in dLN and **f**, spleen three days post EAE immunization (N≥7, mean± SE, \*p < 0.05). **g**, 2D2 cells (1X10<sup>6</sup>) were transferred to WT or cKO mice at d -1. Mice were immunized with MOG-CFA on d 0 and injected with pertussis toxin on d 0 and 2. dLN were analysed on d4 for percentages of 2D2 cells **h**, IFN-γ and IL-17A producing 2D2 cells **i**, IFN-γ and IL-17A production by recipient CD4<sup>+</sup> T cells. (N=4, mean± SE, representative of two independent experiments). **j-k**, FACS purified CD4<sup>+</sup>Foxp3<sup>+</sup> cells from dLN three days post EAE induction were transferred into naïve CD45.1 mice. Percentage of CD45.2<sup>+</sup> cells and CD45.2<sup>+</sup>Foxp3<sup>+</sup> cells in the spleen of recipient mice were determined 18 d. Data are representative of two independent experiments each with at least 3 mice per group.

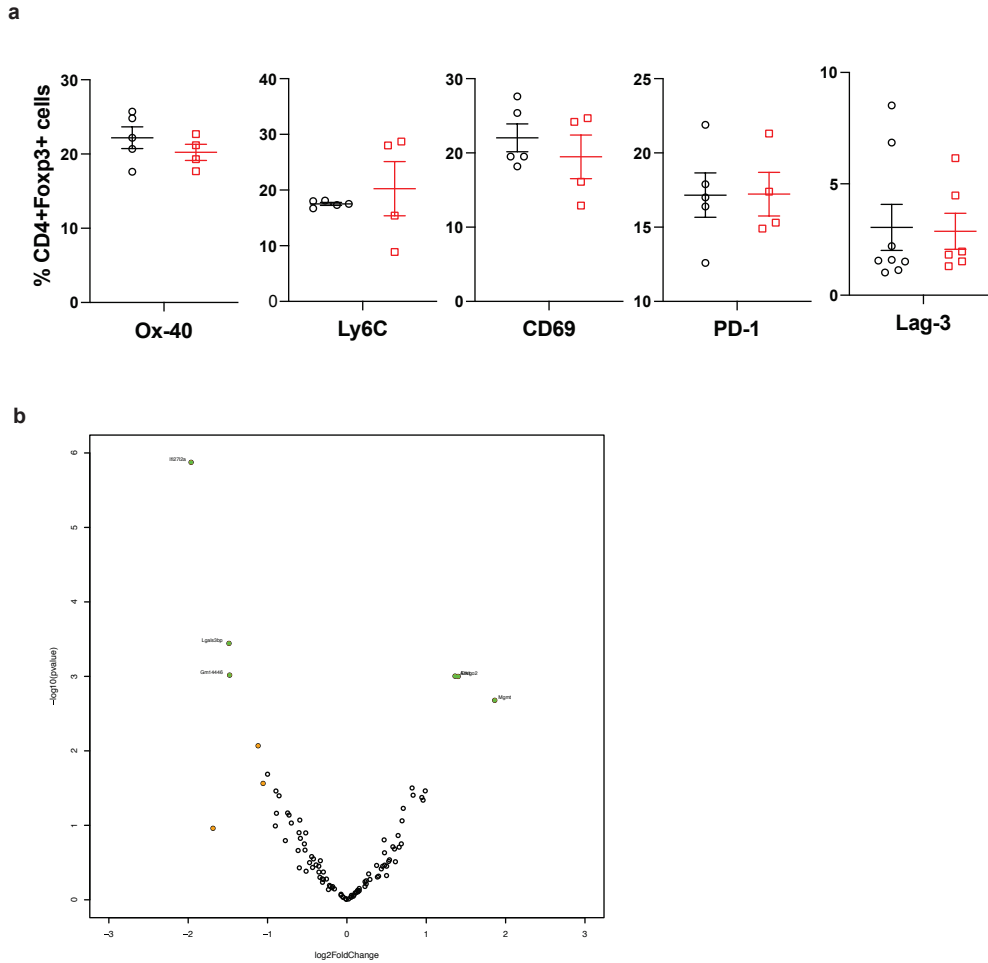

## Supplementary Fig. 2 | Phenotypic and molecular characterization of cKO Tregs.

**a**, Cell surface antigen expression on  $CD4^{+}Foxp3^{+}$  cells from spleen of unimmunized  $Fxp3^{YFP-Cre}$  (black) or  $IFNAR^{fl/fl}Fxp3^{YFP-Cre}$  mice (red).

Data are representative of mean  $\pm$  SE,  $N \geq 4$ ,  $*p < 0.05$ .

**b**, Volcano plots of RNA-seq analysis of  $Fxp3^{YFP-Cre}$  or  $IFNAR^{fl/fl}Fxp3^{YFP-Cre}$  mice LN from unimmunized mice.  $N=3$  mice.

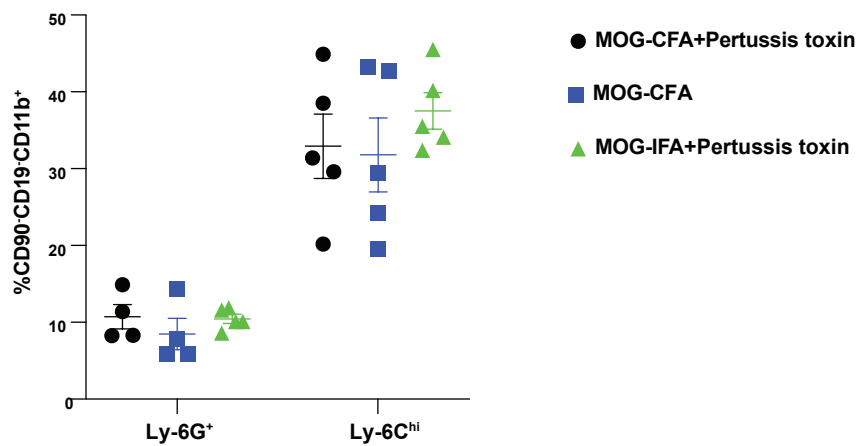

### Supplementary Fig. 3 | Homing of MDSCs to dLN does not require Pertussis toxin or CFA.

Mice were divided into 3 groups.

One group was immunized with MOG-IFA s.c on d 0 and received Pertussis toxin i.p d 0 and d 2; the second group received only MOG-CFA s.c on day 0 .

The control group received MOG-CFA s.c d 0 and pertussis toxin i.p on d 0 and 2.

dLN were analyzed for CD11b<sup>+</sup> cells at day 5. N=4, mean± SE.
